# Supplementary material for: A first-in-class pan-lysyl oxidase inhibitor impairs stromal remodeling and enhances gemcitabine response and survival in pancreatic cancer
Source: PubMed Central journal article supplement (PMC10518255; doi:10.1038/s43018-023-00614-y), 2023-08-28
Supplement: 43018_2023_614_MOESM1_ESM.pdf [file 43018_2023_614_MOESM1_ESM.pdf]

---

# **A first-in-class pan-lysyl oxidase inhibitor impairs stromal remodeling and enhances gemcitabine response and survival in pancreatic cancer**

---

In the format provided by the authors and unedited

---

1 **Supplementary data 1: Preparation of (Z)-3-fluoro-4-(quinolin-8-ylsulfonyl)but-2-en-1-amine**  
2 **dihydrochloride monohydrate (PXS-5505 dihydrochloride monohydrate)**

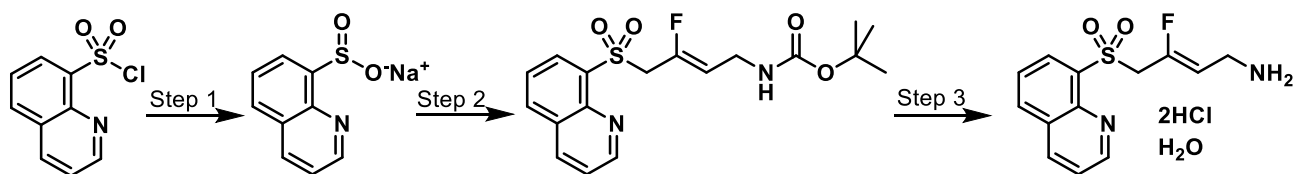

4 **Step 1: Preparation of sodium quinoline-8-sulfinate**

5 A vessel charged with  $\text{Na}_2\text{SO}_3$  (6.70 kg, 53.2 mol) and water (21.0 L) was stirred at room  
6 temperature for 20 min. To the vessel was added  $\text{Na}_2\text{CO}_3$  (5.50 kg, 51.9 mol) and stirring was  
7 continued at room temperature for 20 min. Quinoline-8-sulfonyl chloride (6.00 kg, 26.4 mol) was  
8 then added portionwise while maintaining the temperature below 40 °C. The resulting mixture  
9 was stirred at room temperature for 3 h. The reaction mixture was filtered and the filter cake was  
10 washed with methanol (7.0 L). The filtrate was concentrated to dryness *in vacuo*, and to the  
11 resulting residue was added methanol (7.0 L). After stirring at room temperature for 1 h, the  
12 mixture was again filtered and the filtrate concentrated to dryness. In a second, and final,  
13 washing cycle the residue was taken up in methanol (10.0 L) and stirring was continued at room  
14 temperature for 1 h. The mixture was filtered and the filtrate was concentrated *in vacuo* to afford  
15 sodium quinoline-8-sulfinate (4.10 kg) that was used in the next step.

16  
17 **Step 2: Preparation of *tert*-butyl (Z)-(3-fluoro-4-(quinolin-8-ylsulfonyl)but-2-en-1-yl)carbamate**

18 A vessel charged with *tert*-butyl (Z)-(4-bromo-3-fluorobut-2-en-1-yl)carbamate (prepared  
19 according to reference<sup>1</sup>; 3.50 kg, 13.1 mol), sodium quinoline-8-sulfinate (4.20 kg, 19.5 mol),  
20 prepared as described in Step 1, and *N,N*-dimethylformamide (17.5 L) was cooled to 15 – 20 °C.  
21 The resulting mixture was stirred at this temperature for 20 h. The mixture was then diluted with  
22 ethyl acetate (35.0 L) and water (35.0 L), and stirring was continued for a further 10 min. The  
23 organic layer was then separated and washed with water (20.0 L x 2). After concentrating the  
24 organic layer to approximately 20 L, *n*-heptane (42.0 L) was added drop-wise. The resulting

25 suspension was stirred at 20 – 30 °C for 20 h. The solid was isolated by filtration, washed with  
26 *n*-heptane and then dried under vacuum at 50 – 55 °C for 20 h to afford *tert*-butyl (*Z*)-(3-fluoro-  
27 4-(quinolin-8-ylsulfonyl)but-2-en-1-yl)carbamate (3.80 kg, 77%). Retention time = 12.97 min;  
28 Method - Agilent LC/MSD 1200 Series; column: ZORBAX SB-C18, ODS 2000 (50 × 4.6 mm, 5  
29 μm) operating in ES (+) or (-) ionization mode; flow rate 1.5 mL/min; Temperature (T) = 30 °C;  
30 detection wavelength: 214 nm; mobile phase: from 5% acetonitrile (containing 0.05%  
31 trifluoroacetic acid (TFA)) and 95% water (containing 0.05% TFA) to 90% acetonitrile and 10%  
32 water, over 24 min.

33

34 Step 3: Preparation of (*Z*)-3-fluoro-4-(quinolin-8-ylsulfonyl)but-2-en-1-amine dihydrochloride  
35 monohydrate (PXS-5505 dihydrochloride monohydrate)

36 To a vessel charged with HCl (1.5 M in ethyl acetate; 53 L) at 10 – 20 °C was added *tert*-butyl  
37 (*Z*)-(3-fluoro-4-(quinolin-8-ylsulfonyl)but-2-en-1-yl)carbamate (5.3 kg, 14 mol) prepared as  
38 described in Step 2. The mixture was stirred at 15 °C for 4 h. The resulting solid was isolated by  
39 filtration and washed with ethyl acetate (20 L). To a flask containing the solid was added ethyl  
40 acetate (53 L). The suspension was then stirred at 10 – 20 °C for 2 h. The solid was again isolated  
41 by filtration and washed with ethyl acetate (20 L). The solid was dissolved in methanol (53 L) and  
42 the solution was filtered. To this was then added water (500 mL) and *tert*-butyl methyl ether (53  
43 L) drop-wise and stirring was continued at 15 °C for a further 20 h. The solid was collected by  
44 filtration and dried under vacuum at 55 – 60 °C to afford (*Z*)-3-fluoro-4-(quinolin-8-ylsulfonyl)but-  
45 2-en-1-amine dihydrochloride monohydrate (PXS-5505 dihydrochloride monohydrate) (4.4 kg,  
46 90%). <sup>1</sup>H NMR (400 MHz, D<sub>2</sub>O) δ ppm: 8.96 (dd, *J* = 5.4, 1.8 Hz, 1H), 8.65 (dd, *J* = 8.6, 1.4 Hz,  
47 1H), 8.34 (dd, *J* = 7.6, 0.8 Hz, 1H), 8.24 (dd, *J* = 8.2, 1.0 Hz, 1H), 7.77 (dd, *J* = 8.6, 5.0 Hz, 1H),  
48 7.71 (t, *J* = 7.8 Hz, 1H), 5.02 (dt, *J* = 33.6, 7.3 Hz, 1H), 4.61 (d, *J* = 19.2 Hz, 2H), 3.47 (d, *J* = 7.2  
49 Hz, 2H); LCMS: for C<sub>13</sub>H<sub>13</sub>FN<sub>2</sub>O<sub>2</sub>S calculated 280.1, found 281.1 [M+H]<sup>+</sup>.

50

51 **Supplementary data 2:** <sup>1</sup>H NMR spectrum of PXS-5505

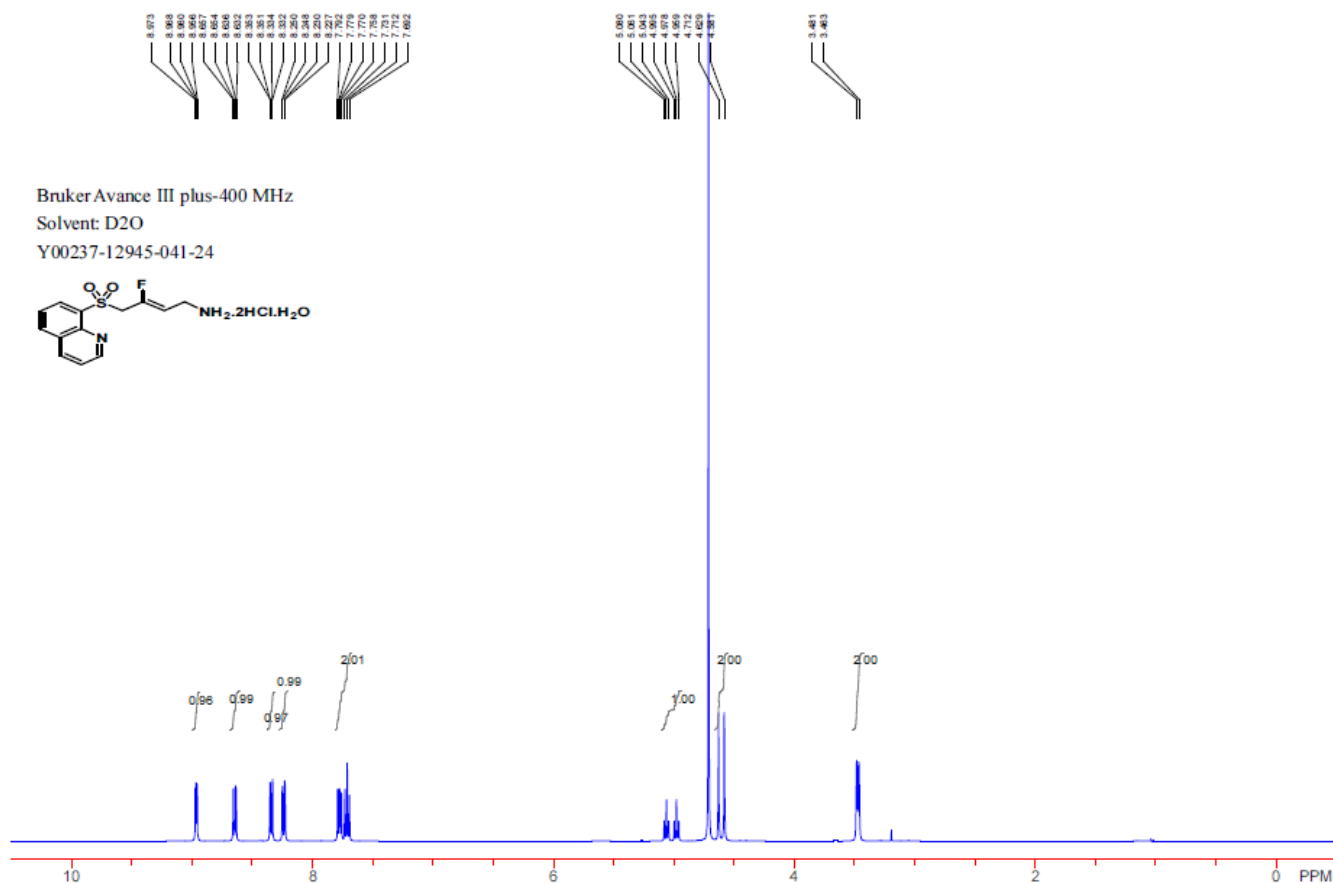

52

53 **Supplementary data 3:** Liquid chromatography–mass spectrometry (LCMS) data for PXS-5505

54 Method: Data was recorded on a Shimadzu LC-MS 2020 instrument operating in ES (+) or (-)  
55 ionization mode; LC-MS column Restek Raptor ARC-18 5um (4.6x150mm); mobile phase A:  
56 0.1% formic acid in Milli Q Water, mobile phase B: 0.1% formic acid in methanol (gradient grade);  
57 flow rate: 1.5 mL/min; column oven temperature: 40 °C; run time: 9.4 min; injection volume: 3  
58 µL; binary gradient flow program: 95% water (0.1% formic acid) and 5% methanol (0.1% formic  
59 acid) to 50% water (0.1% formic acid) and 50% methanol (0.1 % formic acid) over 1.40 min;  
60 then to 5% water (0.1% formic acid) and 95% methanol (0.1 % formic acid) at 6.00 min; holding  
61 the condition until 7.40 min, bringing back to 95% water (0.1% formic acid) and 5% methanol  
62 (0.1 % formic acid) from 7.41 min to 9.40 min.

63 a) LC trace (254 nm):

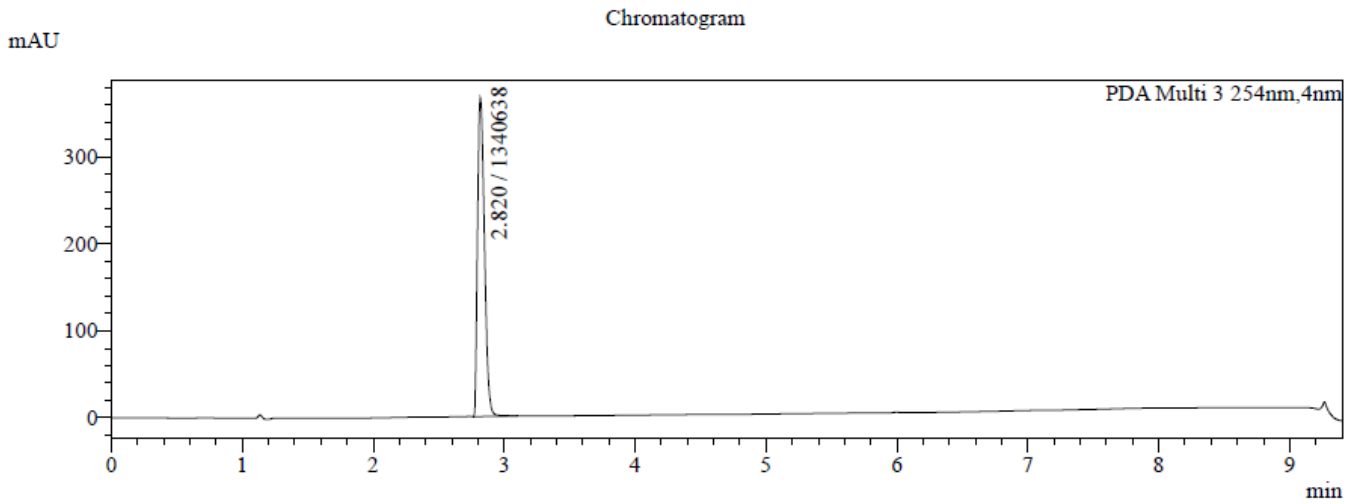

Peak Table

| PDA Ch3 254nm |           |         |         |
|---------------|-----------|---------|---------|
| Peak#         | Ret. Time | Area    | Area%   |
| 1             | 2.820     | 1340638 | 100.000 |
| Total         |           | 1340638 | 100.000 |

64

65

66 b) MS of the product peak (ES(+) ionization mode):

MS Spectrum

Line#:1 R. Time:----(Scan#:----)  
 MassPeaks:491  
 Spectrum Mode:Averaged 2.785-2.833(237-241) Base Peak:281(5257299)  
 BG Mode:Calc Segment 1 - Event 1

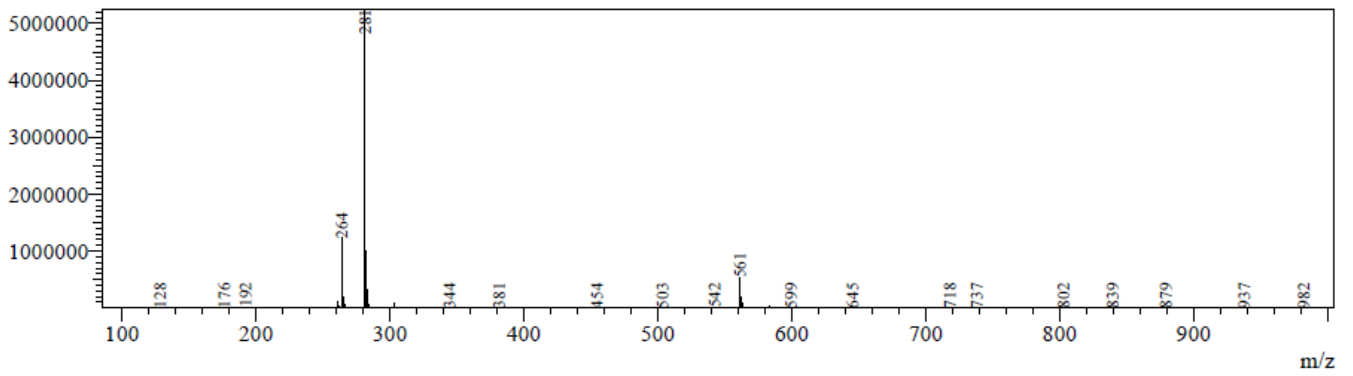

67

68

69

70

71

72

73

74

75



77 Reference:

- 78 1. Findlay, A. D., Foot, J. S., Buson, A., Deodhar, M., Jarnicki, A. G., Hansbro, P. M., Liu, G.,  
79 Schilter, H., Turner, C. I., Zhou, W. & Jarolimek, W. Identification and Optimization of  
80 Mechanism-Based Fluoroallylamine Inhibitors of Lysyl Oxidase-Like 2/3. *J. Med. Chem.* 62,  
81 9874-9889 (2019).

82
