# Supplementary material for: A first-in-class pan-lysyl oxidase inhibitor impairs stromal remodeling and enhances gemcitabine response and survival in pancreatic cancer
Source: PubMed Central journal article supplement (PMC10518255; doi:10.1038/s43018-023-00614-y), 2023-08-28

Unmodified western blot from Extended data figure 1K

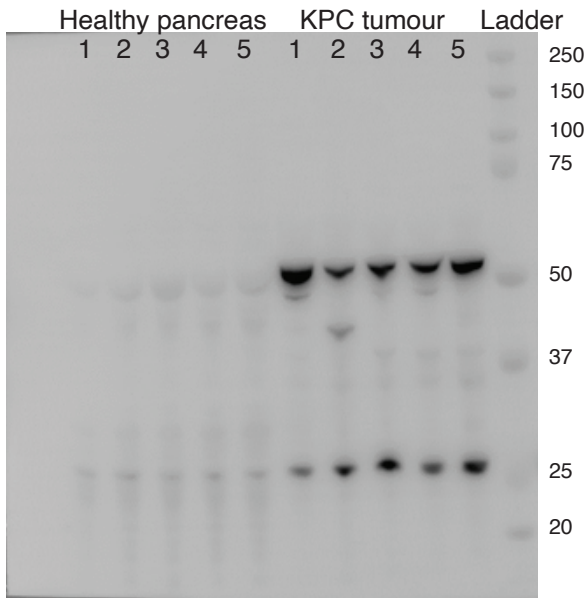

Ponceau staining of western blot from Extended data figure 1K

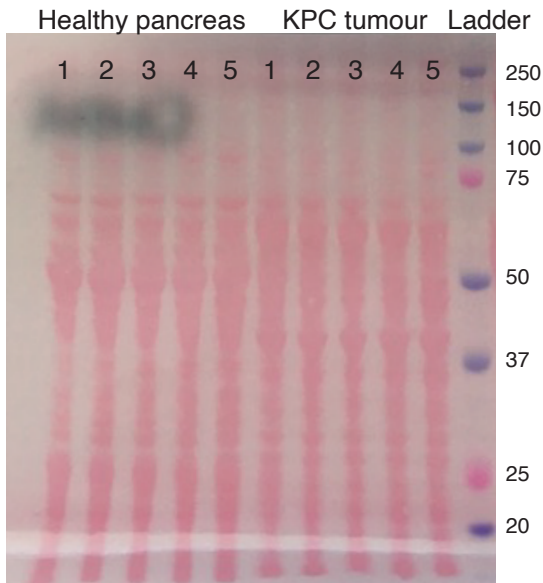

Supplement: 43018_2023_614_MOESM5_ESM.pdf [file 43018_2023_614_MOESM5_ESM.pdf]
